# Supplementary material for: Species Diversity and Driving Factors of Benthic and Zooplanktonic Assemblages at Different Stages of Thermokarst Lake Development: A Case Study in the Lena River Delta (Middle Siberia)
Source: MDPI journal article supplement (doi:10.3390/d15040511), 2023-04-02
Supplement: s1 [file s1]

## Supplement

**Table S1.** Species list and frequency of planktonic crustacean in water bodies of Kurungnakh and Argaa-Bilir-Aryata Islands (southern part of the Lena River Delta) in July–August 2017 and 2020 (\*—species noted in the first time)

| Taxons                                                              | Frequency<br>(Number of water<br>bodies) | Lakes | Complex<br>polygon<br>ponds | Single<br>polygon<br>ponds | Oxbow |
|---------------------------------------------------------------------|------------------------------------------|-------|-----------------------------|----------------------------|-------|
| Class Branchiopoda Latreille, 1817                                  |                                          |       |                             |                            |       |
| Order Anostraca Sars, 1867                                          |                                          |       |                             |                            |       |
| Family Chirocephalidae Daday, 1910                                  |                                          |       |                             |                            |       |
| <i>Polyartemia forcipata</i> (Fischer, 1851)                        | 3                                        | +     | -                           | -                          | -     |
| Family Branchinectidae Daday, 1910                                  |                                          |       |                             |                            |       |
| <i>Branchinecta paludosa</i> (Müller O.F., 1788)                    | 16                                       | +     | +                           | +                          | -     |
| Superorder Cladocera Latreille, 1829                                |                                          |       |                             |                            |       |
| Order Ctenopoda Sars, 1865                                          |                                          |       |                             |                            |       |
| Family Holopedidae Sars, 1865                                       |                                          |       |                             |                            |       |
| <i>Holopedium gibberum</i> Zaddach, 1855                            | 1                                        | +     | -                           | -                          | -     |
| Family Sididae Baird, 1850                                          |                                          |       |                             |                            |       |
| <i>Sida crystallina</i> (Müller O.F., 1776)                         | 3                                        | +     | -                           | -                          | -     |
| Order Anomopoda                                                     |                                          |       |                             |                            |       |
| Family Bosminidae Baird, 1845                                       |                                          |       |                             |                            |       |
| <i>Bosmina longirostris</i> (Müller O.F., 1785)                     | 8                                        | +     | +                           | -                          | +     |
| <i>B. cf. longispina</i> (Müller O.F., 1785)                        | 4                                        | +     | +                           | +                          | -     |
| Family Chydoridae Dybowski & Grochowski, 1894                       |                                          |       |                             |                            |       |
| <i>Acroperus harpae</i> (Baird, 1834)                               | 7                                        | +     | +                           | +                          | +     |
| <i>Alona guttata</i> Sars G.O., 1862                                | 10                                       | +     | +                           | +                          | -     |
| * <i>A. quadrangularis</i> (Müller O.F., 1776)                      | 6                                        | +     | +                           | +                          | +     |
| <i>Alonopsis elongatus</i> Sars G.O., 1862                          | 19                                       | +     | +                           | +                          | -     |
| <i>Biapertura affinis</i> (Leydig, 1860)                            | 11                                       | +     | +                           | +                          | -     |
| <i>Chydorus cf. sphaericus</i> (Müller O.F., 1785)                  | 27                                       | +     | +                           | +                          | +     |
| * <i>Paralona pigra</i> Sars G.O., 1862                             | 2                                        | +     | -                           | -                          | -     |
| <i>Pleuroxus cf. trigonellus</i> (Müller O.F., 1776)                | 5                                        | +     | -                           | +                          | -     |
| Family Daphniidae Straus, 1820                                      |                                          |       |                             |                            |       |
| <i>Daphnia cucullata</i> Sars G.O., 1862                            | 3                                        | +     | +                           | -                          | -     |
| <i>D. cf. longispina</i> (Müller O.F., 1776)                        | 15                                       | +     | +                           | +                          | +     |
| <i>D. cf. pulex</i> Leydig, 1860                                    | 6                                        | +     | +                           | +                          | -     |
| Family Euryceridae Kurz, 1875                                       |                                          |       |                             |                            |       |
| <i>Eurycerus lamellatus</i> (O.F. Müller, 1776)                     | 5                                        | +     | +                           | +                          | +     |
| Subclass Copepoda Milne Edwards, 1840                               |                                          |       |                             |                            |       |
| Order Calanoida Sars, 1903                                          |                                          |       |                             |                            |       |
| Family Temoridae Giesbrecht, 1893                                   |                                          |       |                             |                            |       |
| <i>Eurytemora gracilicauda</i> Akatova, 1949                        | 1                                        | -     | -                           | -                          | +     |
| <i>E. gracilis</i> (Sars G.O., 1863)                                | 6                                        | +     | +                           | -                          | -     |
| <i>E. cf. raboti</i> Richard, 1897                                  | 1                                        | -     | +                           | -                          | -     |
| <i>Hetercope borealis</i> (Fischer, 1851)                           | 24                                       | +     | +                           | +                          | +     |
| Family Diaptomidae Baird, 1850                                      |                                          |       |                             |                            |       |
| <i>Eudiaptomus graciloides</i> (Lilljeborg, 1888)                   | 9                                        | +     | +                           | +                          | -     |
| <i>Leptodiaptomus angustilobius</i> (Sars G.O., 1898)               | 18                                       | +     | +                           | +                          | -     |
| <i>Mixodiaptomus theeli</i> (Lilljeborg in Guerne et Richard, 1889) | 17                                       | +     | +                           | +                          | +     |
| Order Cyclopoida Burmeister, 1834                                   |                                          |       |                             |                            |       |
| Family Cyclopidae Rafinesque, 1815                                  |                                          |       |                             |                            |       |
| <i>Acanthocyclops venustus</i> (Norman & Scott, 1906)               | 25                                       | +     | +                           | +                          | -     |

|                                                          |    |    |    |    |    |
|----------------------------------------------------------|----|----|----|----|----|
| <i>A. vernalis vernalis</i> (Fischer, 1853)              | 13 | +  | +  | +  | -  |
| <i>Cyclops scutifer scutifer</i> Sars G.O., 1863         | 13 | +  | +  | +  | -  |
| <i>C. kolensis</i> Lilljeborg, 1901                      | 19 | +  | +  | +  | +  |
| <i>C. cf. strenuus</i> Fischer, 1851                     | 16 | +  | +  | +  | +  |
| <i>Diacyclops bicuspidatus</i> (Claus, 1857)             | 6  | +  | +  | +  | -  |
| <i>D. crassicaudis</i> (Sars G.O., 1863)                 | 8  | +  | -  | +  | +  |
| <i>D. languidoides</i> (Lilljeborg, 1901)                | 13 | +  | +  | +  | +  |
| <i>Eucyclops</i> gr. <i>serrulatus</i> (Fischer, 1851)   | 6  | +  | +  | +  | -  |
| <i>Megacyclops gigas gigas</i> (Claus, 1857)             | 10 | +  | +  | +  | -  |
| <i>M. viridis viridis</i> (Jurine, 1820)                 | 12 | +  | +  | +  | -  |
| <i>Mesocyclops leuckarti leuckarti</i> (Claus, 1857)     | 2  | +  | -  | -  | -  |
| <i>Paracyclops fimbriatus fimbriatus</i> (Fischer, 1853) | 5  | +  | +  | +  | +  |
| Order Harpacticoida Sars, 1903                           |    |    |    |    |    |
| Family Canthocamptidae Brady, 1880                       |    |    |    |    |    |
| <i>Canthocamptus glacialis</i> (Lilljeborg, 1902)        | 5  | +  | -  | +  | -  |
| Class Ostracoda Latreille, 1802                          |    |    |    |    |    |
| Ostracoda spp.                                           | 6  | +  | +  | +  | +  |
| Total species richness:                                  |    | 38 | 31 | 30 | 15 |

**Table S2.** Species list and frequency of macrozoobenthos in water bodies of Kurungnakh and Samoilovsky Islands (southern part of the Lena River Delta) in July–August 2020  
(\*—species noted in the first time)

| Taxons                                               | Frequency<br>(number of water<br>bodies) | Lakes | Complex<br>polygon<br>ponds | Single<br>polygon<br>ponds | Oxbow |
|------------------------------------------------------|------------------------------------------|-------|-----------------------------|----------------------------|-------|
| Phylum Annelida Lamarck, 1802                        |                                          |       |                             |                            |       |
| Class Clitellata Michaelsen, 1919                    |                                          |       |                             |                            |       |
| Subclass Oligochaeta Grube, 1850                     |                                          |       |                             |                            |       |
| Order Crassicitellata Jamieson, 1988                 |                                          |       |                             |                            |       |
| * <i>Eiseniella tetraedra</i> (Savigny, 1826)        | 21                                       | +     | +                           | +                          | +     |
| Order Tubificida Jamieson, 1978                      |                                          |       |                             |                            |       |
| * <i>Alexandrovina ringulata</i> (Sokolskaja, 1961)  | 4                                        | +     | +                           |                            | +     |
| * <i>Embolecephalus velutinus</i> (Grube, 1879)      | 8                                        | +     | +                           |                            | +     |
| * <i>Limnodrilus</i> sp. Claparede, 1862             | 11                                       | +     | +                           | +                          | +     |
| * <i>Nais</i> sp.                                    | 1                                        | +     |                             |                            |       |
| * <i>Spirosperma ferox</i> Eisen, 1879               | 1                                        |       |                             | +                          |       |
| <i>Tubifex tubifex</i> (Muller, 1774)                | 7                                        | +     | +                           |                            | +     |
| Order Enchytraeida Kasprzak, 1984                    |                                          |       |                             |                            |       |
| Enchytraeidae spp.                                   | 1                                        |       |                             | +                          |       |
| Subclass Hirudinea Savigny, 1822                     |                                          |       |                             |                            |       |
| Order Rhynchobdellida Blanchard, 1894                |                                          |       |                             |                            |       |
| * <i>Piscicola geometra</i> Linnaeus, 1761           | 1                                        | +     |                             |                            |       |
| Class Gastropoda Cuvier, 1795                        |                                          |       |                             |                            |       |
| Superorder Hygrophila Férussac, 1822                 |                                          |       |                             |                            |       |
| * <i>Gyraulus borealis</i> Lovén in Westerlund, 1875 | 4                                        | +     |                             |                            | +     |
| * <i>Physa</i> cf. <i>bulla</i> (Müller, 1774)       | 9                                        | +     | +                           | +                          | +     |
| <i>Sibirenauta sibirica</i> Westerlund, 1877         | 11                                       | +     | +                           | +                          |       |
| Class Bivalvia Linnaeus, 1758                        |                                          |       |                             |                            |       |
| Order Sphaeriida Lemer, Bieler & Giribet, 2019       |                                          |       |                             |                            |       |
| * <i>Euglesa casertana</i> Poli, 1791                | 1                                        | +     |                             |                            |       |
| * <i>Henslowiana lilljeborgii</i> (Clessin in        | 2                                        | +     |                             |                            | +     |

|                                                               |    |   |   |   |   |
|---------------------------------------------------------------|----|---|---|---|---|
| Esmarket Hoyer, 1886)                                         |    |   |   |   |   |
| * <i>Roseana borealis</i> Clessin in Westerlund, 1877         | 1  |   |   |   | + |
| Subclass Acari Leach, 1817                                    |    |   |   |   |   |
| Order Trombidiformes Reuter, 1909                             |    |   |   |   |   |
| Hydrachnidia spp.                                             | 2  | + |   |   | + |
| Subphylum Crustacea Brünnich, 1772                            |    |   |   |   |   |
| Class Branchiopoda, 1817                                      |    |   |   |   |   |
| Order Anostraca Sars, 1867                                    |    |   |   |   |   |
| <i>Branchinecta paludosa</i> Müller, 1788                     | 2  | + | + |   |   |
| Order Notostraca Sars, 1867                                   |    |   |   |   |   |
| <i>Lepidurus arcticus</i> Pallas, 1793                        | 4  | + | + |   |   |
| Class Malacostraca Latreille, 1802                            |    |   |   |   |   |
| Order Isopoda Latreille, 1816                                 |    |   |   |   |   |
| <i>Asellus hilgendorffii martynovi</i> Birstein, 1947         | 8  | + | + |   | + |
| Order Amphipoda Latreille, 1816                               |    |   |   |   |   |
| <i>Eosynurella jakutana</i> (Martynov, 1931)                  | 11 |   | + | + |   |
| <i>Gammarus lacustris</i> G.O. Sars, 1863                     | 1  | + | + |   | + |
| * <i>Monoporeia affinis</i> Lindström, 1855                   | 16 |   |   |   | + |
| Class Hexapoda Latreille, 1825                                |    |   |   |   |   |
| Subclass Insecta Linnaeus, 1758                               |    |   |   |   |   |
| Order Ephemeroptera Hyatt et Arms, 1891                       |    |   |   |   |   |
| * <i>Baetis macani</i> Kimmins, 1957                          | 4  | + | + | + |   |
| Order Plecoptera Burmeister, 1839                             |    |   |   |   |   |
| * <i>Nemoura arctica</i> Esben-Petersen, 1910                 | 5  | + |   |   | + |
| Order Trichoptera Kirby, 1813                                 |    |   |   |   |   |
| * <i>Agrypnia obsoleta</i> Hagen, 1864                        | 4  |   | + |   |   |
| * <i>Dicosmoecus obscuripennis</i> Banks, 1938                | 10 | + | + | + | + |
| <i>Grensia praeterita</i> Walker, 1852                        | 10 | + | + |   | + |
| * <i>Hydatophylax</i> sp.                                     | 2  | + |   |   | + |
| * <i>Lenarchus</i> sp.                                        | 2  |   | + | + |   |
| * <i>Micrasema</i> gr. <i>gelidum</i> McLachlan, 1876         | 17 | + | + | + | + |
| Order Coleoptera Linnaeus, 1758                               |    |   |   |   |   |
| * <i>Agabus adpressus</i> Aube, 1837                          | 1  |   | + |   |   |
| * <i>A. elongatus</i> Gyllenhal in C.R.Sahlberg, 1826         | 4  |   |   | + |   |
| * <i>Colymbetes dolabratus</i> Paykull 1798                   | 6  | + | + | + |   |
| * <i>Gyrinus opacus</i> Sahlberg, 1817                        | 2  | + |   |   |   |
| * <i>Hydroporus lapponum</i> Gyllenhal, 1808                  | 1  |   |   | + |   |
| * <i>Hydroporus</i> sp.                                       | 1  | + |   |   |   |
| Order Diptera Linnaeus, 1758                                  |    |   |   |   |   |
| * <i>Acricotopus lucens</i> (Zetterstedt, 1850)               | 4  |   |   | + |   |
| * <i>Boreosimulium baffinensis</i> Twinn, 1936                | 1  |   |   | + |   |
| <i>Chironomus</i> sp.                                         | 11 | + | + | + | + |
| * <i>Cladotanytarsus</i> gr. <i>mancus</i> (Walker, 1856)     | 4  | + |   |   | + |
| * <i>Corynoneura scutellata</i> Winnertz, 1846                | 3  | + | + |   |   |
| * <i>Cricotopus fuscus</i> (Kieffer, 1909)                    | 1  | + |   |   |   |
| <i>Cryptochironomus</i> gr. <i>defectus</i> Kieffer 1913      | 3  |   | + |   |   |
| * <i>Culiseta bergrothi</i> Edwards, 1921                     | 1  |   |   | + |   |
| * <i>Derotanypus sibiricus</i> (Kruglova & Chernovskii, 1940) | 1  |   | + |   |   |
| * <i>Dicrotendipes nervosus</i> (Staeger, 1839)               | 5  |   | + | + |   |
| * <i>D. septemmaculatus</i> (Becker, 1908)                    | 5  |   | + | + |   |

|                                                              |    |    |    |    |    |
|--------------------------------------------------------------|----|----|----|----|----|
| * <i>Endochironomus stackelbergi</i> Goetghebuer, 1935       | 2  | +  | +  |    |    |
| * <i>Euphyllidorea lineola</i> Meigen, 1804                  | 1  | +  |    |    |    |
| * <i>Glyptotendipes gripekoveni</i> (Kieffer, 1913).         | 1  |    |    | +  |    |
| * <i>Heterotrissocladius</i> gr. <i>maeeri</i> Brundin, 1949 | 2  | +  |    |    |    |
| * <i>H.</i> gr. <i>marcidus</i> (Walker, 1856)               | 1  |    |    |    | +  |
| * <i>Limnophyes</i> sp.                                      | 1  | +  |    |    |    |
| * <i>Lipiniella araenicola</i> Shilova, 1961                 | 2  | +  |    |    |    |
| * <i>Metriocnemus atratulus</i> (Zetterstedt, 1850)          | 2  |    | +  |    | +  |
| * <i>Oliveridia</i> sp.                                      | 1  | +  |    |    |    |
| * <i>Orthocladius</i> sp. 1                                  | 2  | +  |    | +  |    |
| * <i>Orthocladius</i> sp. 2                                  | 1  | +  | +  | +  |    |
| * <i>Orthocladius</i> sp. 3                                  | 8  | +  |    |    |    |
| * <i>Orthocladius</i> sp. 4                                  | 3  | +  |    |    |    |
| * <i>Paratanytarsus</i> sp.                                  | 1  | +  |    |    |    |
| * <i>Phyllidorea nervosa</i> Schummel, 1829                  | 1  |    | +  |    |    |
| <i>Procladius</i> sp.                                        | 8  | +  | +  | +  | +  |
| * <i>Psectrocladius obivus</i> (Walker, 1856)                | 1  |    | +  |    |    |
| * <i>P. delatoris</i> Zelentsov, 1980                        | 1  | +  |    |    |    |
| * <i>P. fabricus</i> Zelentsov, 1980                         | 5  |    | +  | +  |    |
| * <i>P. fennicus</i> Stora, 1939                             | 3  | +  |    | +  |    |
| * <i>P. ventricosus</i> Kieffer, 1925                        | 1  | +  |    |    |    |
| * <i>P.</i> sp.                                              | 1  |    |    | +  |    |
| * <i>Stictochironomus</i> sp.                                | 11 | +  | +  |    | +  |
| * <i>Sympotthastia</i> sp.                                   | 6  | +  |    |    | +  |
| * <i>Syndiamesa</i> sp.                                      | 2  |    | +  |    |    |
| <i>Tanytarsus</i> sp.                                        | 4  | +  | +  |    |    |
| Total species richness:                                      |    | 48 | 36 | 27 | 25 |

**Table S3.** Species list and frequency of meiobenthic crustacean in water bodies of Kurungnakh and Argaa-Bilir-Aryata Islands (southern part of the Lena River Delta) in July–August 2017 and 2020 (\*—species noted in the first time)

| Taxons                                                      | Frequency<br>(Number of water<br>bodies) | Lakes | Complex<br>polygon<br>ponds | Single<br>polygon<br>ponds | Oxbow |
|-------------------------------------------------------------|------------------------------------------|-------|-----------------------------|----------------------------|-------|
| Superorder Cladocera Latreille, 1829                        |                                          |       |                             |                            |       |
| Order Anomopoda Sars, 1865                                  |                                          |       |                             |                            |       |
| Family Bosminidae Baird, 1845                               |                                          |       |                             |                            |       |
| <i>Bosmina longirostris</i> (Müller O.F., 1785)             | 1                                        | +     | -                           | -                          | -     |
| Family Chydoridae Dybowski & Grochowski, 1894               |                                          |       |                             |                            |       |
| <i>Acroperus harpae</i> (Baird, 1834)                       | 1                                        | -     | -                           | +                          | -     |
| <i>Alona guttata</i> Sars G.O., 1862                        | 6                                        | +     | +                           | +                          | -     |
| * <i>A. quadrangularis</i> (Müller O.F., 1776)              | 1                                        | -     | +                           | -                          | -     |
| <i>Alonopsis elongatus</i> Sars G.O., 1862                  | 1                                        | +     | -                           | -                          | -     |
| <i>Biapertura affinis</i> (Leydig, 1860)                    | 1                                        | +     | -                           | -                          | -     |
| Aloninae juveniles                                          | 4                                        | -     | +                           | -                          | -     |
| <i>Chydorus</i> cf. <i>sphaericus</i> (Müller O.F., 1785)   | 12                                       | +     | +                           | +                          | -     |
| <i>Pleuroxus</i> cf. <i>trigonellus</i> (Müller O.F., 1776) | 1                                        | +     | -                           | -                          | -     |
| Family Daphniidae Straus, 1820                              |                                          |       |                             |                            |       |
| <i>Daphnia</i> cf. <i>pulex</i> Leydig, 1860                | 2                                        | -     | -                           | +                          | -     |
| Family Eurycercidae Kurz, 1875                              |                                          |       |                             |                            |       |
| <i>Eurycercus</i> juveniles                                 | 1                                        | -     | -                           | -                          | +     |
| Subclass Copepoda Milne Edwards, 1840                       |                                          |       |                             |                            |       |

| Order Calanoida Sars, 1903                                      |    |    |    |    |   |
|-----------------------------------------------------------------|----|----|----|----|---|
| Family Temoridae Giesbrecht, 1893                               |    |    |    |    |   |
| <i>Heterocope borealis</i> (Fischer, 1851)                      | 2  | +  | -  | -  | - |
| Order Cyclopoida Burmeister, 1834                               |    |    |    |    |   |
| Family Cyclopidae Rafinesque, 1815                              |    |    |    |    |   |
| <i>Acanthocyclops venustus</i> (Norman & Scott, 1906)           | 16 | +  | +  | +  | + |
| <i>A. vernalis vernalis</i> (Fischer, 1853)                     | 8  | +  | +  | +  | - |
| <i>Cyclops</i> cf. <i>strenuus</i> Fischer, 1851                | 10 | +  | +  | +  | - |
| <i>Diacyclops crassicaudis</i> (Sars G.O., 1863)                | 3  | +  | -  | -  | + |
| <i>D. languidoides</i> (Lilljeborg, 1901)                       | 6  | +  | +  | +  | + |
| <i>D. nanus</i> (Sars G.O., 1863)                               | 2  | +  | +  | -  | - |
| <i>Eucyclops</i> gr. <i>serrulatus</i> (Fischer, 1851)          | 4  | +  | +  | +  | - |
| <i>Megacyclops viridis viridis</i> (Jurine, 1820)               | 7  | -  | +  | +  | - |
| <i>Paracyclops fimbriatus fimbriatus</i> (Fischer, 1853)        | 6  | +  | +  | +  | + |
| Order Harpacticoida Sars, 1903                                  |    |    |    |    |   |
| Family Canthocamptidae Brady, 1880                              |    |    |    |    |   |
| <i>Attheyella dentata</i> (Poggenpool, 1874)                    | 3  | +  | +  | +  | - |
| <i>Attheyella nordenskioldii</i> (Lilljeborg, 1902)             | 1  | -  | -  | +  | - |
| * <i>Attheyella</i> cf. <i>trispinosa</i> (Brady, 1880)         | 1  | -  | -  | +  | - |
| * <i>Bryocamptus arcticus</i> (Lilljeborg, 1902)                | 1  | +  | -  | -  | - |
| <i>B. vej dovskyi</i> (Mrazek, 1893)                            | 3  | +  | -  | +  | - |
| <i>B. abramovae</i> (Novikov, Sharafutdinova, Chertoprud, 2022) | 10 | +  | +  | +  | + |
| <i>B. sp. nov.</i>                                              | 2  | +  | -  | -  | - |
| <i>Canthocamptus glacialis</i> (Lilljeborg, 1902)               | 16 | +  | +  | +  | - |
| <i>Epactophanes richardi</i> Mrazek, 1893                       | 2  | +  | -  | -  | - |
| <i>Maraenobiotus brucei</i> (Ricard, 1898)                      | 6  | +  | +  | +  | - |
| <i>Moraria duthiei</i> (Scott, 1896)                            | 18 | +  | +  | +  | - |
| <i>M. insularis</i> Fefilova, 2008                              | 3  | +  | -  | -  | - |
| <i>M. mrazeki</i> Scott, 1903                                   | 21 | +  | +  | +  | - |
| <i>M. sp. nov.</i>                                              | 13 | +  | +  | -  | - |
| <i>Pesceus reductus</i> (Wilson, 1956)                          | 4  | +  | +  | -  | - |
| <i>P. schmeili</i> (Mrazek, 1893)                               | 4  | +  | -  | -  | - |
| <i>P. sp. nov.</i>                                              | 7  | +  | +  | -  | - |
| Family Nannopodidae Brady, 1880                                 |    |    |    |    |   |
| * <i>Nannopus procerus</i> Fiers & Kotwicki, 2013               | 1  | -  | +  | -  | - |
| Class Ostracoda Latreille, 1802                                 |    |    |    |    |   |
| Ostracoda spp.                                                  | 1  | -  | -  | +  | - |
| Total species richness:                                         |    | 30 | 22 | 21 | 6 |

**Table S4.** Species list and frequency of testate amoebae in water bodies of Kurungnakh and Samoilovsky Islands (southern part of the Lena River Delta) in July–August 2020  
(\*—species noted in the first time)

| Taxons                                            | Frequency<br>(number of<br>water bodies) | Lakes | Complex<br>polygon<br>ponds | Single<br>polygon<br>ponds | Oxbow |
|---------------------------------------------------|------------------------------------------|-------|-----------------------------|----------------------------|-------|
| Class Elardia (Kang et al., 2017)                 |                                          |       |                             |                            |       |
| Order Arcellinida (Kent, 1880)                    |                                          |       |                             |                            |       |
| Suborder Glutinoconcha (Lahr et al. 2019)         |                                          |       |                             |                            |       |
| Infraorder Sphaerothecina (Kosakyan et al., 2016) |                                          |       |                             |                            |       |
| Family Arcellidae (Ehrenberg, 1843)               |                                          |       |                             |                            |       |
| * <i>Arcella gibbosa</i> (Penard, 1890)           | 2                                        | -     | +                           | +                          | -     |
| * <i>Arcella hemisphaerica</i> (Perty, 1852)      | 1                                        | +     | -                           | -                          | -     |
| * <i>Arcella rotundata</i> (Playfair, 1918)       | 3                                        | -     | +                           | +                          | -     |

|                                                                         |    |   |   |   |   |
|-------------------------------------------------------------------------|----|---|---|---|---|
| * <i>Arcella rotundata stenostoma undulata</i> (Deflandre, 1928)        | 2  | - | - | + | - |
| * <i>Galeripora arenaria</i> (Greeff, 1866)                             | 1  | - | + | - | - |
| * <i>Galeripora arenaria compressa</i> (Chardez, 1974)                  | 1  | - | + | - | - |
| <i>Galeripora discoides</i> (Ehrenberg, 1843)                           | 7  | + | + | + | - |
| * <i>Galeripora discoides foveosa</i> (Playfair, 1918)                  | 6  | - | + | + | - |
| Family Netzeiliidae (Kosakyan et al., 2016)                             |    |   |   |   |   |
| <i>Cyclopyxis eurytoma</i> (Deflandre, 1929)                            | 2  | - | - | - | + |
| Incertae sedis Sphaerothecina                                           |    |   |   |   |   |
| * <i>Trigonopyxis arcula</i> (Leidy, 1879)                              | 3  | - | - | + | + |
| Infraorder Longithecina (Lahr et al., 2019)                             |    |   |   |   |   |
| Family Diffugiidae (Wallich, 1864)                                      |    |   |   |   |   |
| * <i>Diffugia bacilliarum</i> (Perty, 1849)                             | 1  | - | + | - | - |
| * <i>Diffugia brevicolla</i> (Cash et Hopkinson, 1909)                  | 1  | - | + | - | - |
| * <i>Diffugia cylindrus</i> (Thomas, 1953)                              | 2  | + | - | + | - |
| * <i>Diffugia gassowskii</i> (Gassowsky, 1936)                          | 4  | - | - | + | - |
| * <i>Diffugia gigantea</i> (Chardez, 1967)                              | 1  | - | - | + | - |
| * <i>Diffugia globulosa</i> (Dujardin, 1837)                            | 6  | + | + | + | - |
| * <i>Diffugia gramen</i> (Penard, 1902)                                 | 1  | + | - | - | - |
| <i>Diffugia lucida</i> (Penard, 1890)                                   | 5  | - | + | + | + |
| * <i>Diffugia microstoma</i> (Thomas, 1954)                             | 1  | - | - | + | - |
| * <i>Diffugia oblonga</i> (Ehrenberg, 1838)                             | 1  | - | - | + | - |
| * <i>Diffugia parva</i> (Thomas, 1954)                                  | 1  | + | - | - | - |
| <i>Diffugia penardi</i> (Hopkinson, 1909)                               | 7  | + | + | + | + |
| Family Lesquereusiidae (Jung, 1942)                                     |    |   |   |   |   |
| * <i>Lesquereusia epistomium</i> (Penard, 1893)                         | 5  | - | + | + | - |
| * <i>Paraquadrula irregularis</i> (Archer, 1877)                        | 1  | - | - | + | - |
| Infraorder Excentrostoma (Lahr et al., 2019)                            |    |   |   |   |   |
| Family Centropyxidae (Jung, 1942)                                       |    |   |   |   |   |
| <i>Centropyxis aculeata</i> (Ehrenberg, 1838)                           | 8  | + | + | + | - |
| * <i>Centropyxis aculeata oblonga</i> (Deflandre, 1929)                 | 1  | + | - | - | - |
| <i>Centropyxis aerophila</i> (Deflandre, 1929)                          | 23 | + | + | + | + |
| * <i>Centropyxis aerophila sphagnicola</i> (Deflandre, 1929)            | 7  | + | + | + | - |
| <i>Centropyxis cassis</i> (Wallich, 1864)                               | 13 | + | + | + | + |
| * <i>Centropyxis constricta</i> (Ehrenberg, 1841)                       | 2  | + | - | - | + |
| <i>Centropyxis eornis</i> (Ehrenberg, 1841)                             | 7  | + | + | + | - |
| <i>Centropyxis elongata</i> (Penard, 1890)                              | 4  | + | + | - | + |
| * <i>Centropyxis gasparella</i> (Chardez, Beyens et de Bock, 1988)      | 3  | - | - | + | - |
| * <i>Centropyxis marsupiformis</i> (Wallich, 1864)                      | 1  | - | - | + | - |
| * <i>Centropyxis minuta</i> (Deflandre, 1929)                           | 2  | - | + | - | + |
| * <i>Centropyxis orbicularis</i> (Deflandre, 1929)                      | 3  | + | + | + | - |
| <i>Centropyxis platystoma</i> (Penard, 1890)                            | 13 | + | + | + | - |
| Infraorder Hyalospheniiformes (Lahr et al., 2019)                       |    |   |   |   |   |
| Family Hyalospheniidae (Schultze, 1977, emend. Kosakyan and Lara, 2012) |    |   |   |   |   |
| * <i>Hyalosphenia platystoma</i> (West, 1903)                           | 1  | - | + | - | - |
| * <i>Longinebela penardiana</i> (Deflandre, 1936)                       | 1  | + | - | - | - |
| * <i>Nebela tincta</i> (Leidy, 1879)                                    | 8  | - | + | + | - |
| * <i>Padaungiella lageniformis</i> (Penard, 1902)                       | 1  | - | - | + | - |
| * <i>Padaungiella wailesi</i> (Deflandre, 1936)                         | 1  | - | + | - | - |

| Infraorder Volnustoma (Lahr et al., 2019)                      |    |   |   |   |   |
|----------------------------------------------------------------|----|---|---|---|---|
| Family Heleoperidae (Jung, 1942)                               |    |   |   |   |   |
| <i>Heleopera petricola</i> (Leidy, 1879)                       | 1  | - | - | + | - |
| * <i>Heleopera petricola amethystea</i> (Penard, 1902)         | 6  | - | + | + | - |
| * <i>Heleopera sphagni</i> (Leidy, 1874)                       | 1  | - | + | - | - |
| Suborder Organoconcha (Lahr et al., 2019)                      |    |   |   |   |   |
| Family Microchlamyidae (Ogden, 1985)                           |    |   |   |   |   |
| * <i>Microchlamys patella</i> (Claparède & Lachmann, 1859)     | 14 | + | + | + | + |
| * <i>Microchlamys</i> sp.                                      | 2  | - | + | + | - |
| * <i>Pyxidicula cymbalum</i> (Penard, 1902)                    | 5  | + | + | + | - |
| * <i>Pyxidicula gibbosa</i> (Schönborn, 1966)                  | 1  | - | - | + | - |
| * <i>Pyxidicula operculata</i> (Agardh, 1827)                  | 9  | + | + | + | - |
| * <i>Pyxidicula patens</i> (Claparede et Lachmann, 1858)       | 4  | + | + | + | - |
| * <i>Pyxidicula</i> sp.                                        | 6  | - | + | + | - |
| Suborder Phryganellina (Bovee, 1985)                           |    |   |   |   |   |
| Family Phryganellidae (Jung, 1942)                             |    |   |   |   |   |
| <i>Phryganella acropodia</i> (Hertwig et Lesser, 1874)         | 4  | + | - | + | - |
| Family Cryptodiffugiidae (Jung, 1942)                          |    |   |   |   |   |
| * <i>Cryptodiffugia crenulata</i> (Playfair, 1917)             | 1  | - | - | + | - |
| * <i>Cryptodiffugia oviformis</i> (Penard, 1890)               | 6  | + | + | + | - |
| * <i>Cryptodiffugia oviformis fusca</i> (Penard, 1890)         | 6  | + | + | + | - |
| * <i>Cryptodiffugia voighti</i> (Schmidt, 1926)                | 1  | - | - | + | - |
| Incertae sedis Arcellinida                                     |    |   |   |   |   |
| * <i>Argynnia dentistoma</i> (Penard, 1890)                    | 1  | - | + | - | - |
| * <i>Argynnia dentistoma laevis</i> (Hopkinson, 1908)          | 1  | - | - | + | - |
| * <i>Lagenodiffugia sphaeroideus</i> (Tarnogradsky, 1961)      | 1  | + | - | - | - |
| * <i>Zivkovicia compressa</i> (Carter, 1864)                   | 1  | - | - | - | + |
| * <i>Zivkovicia spectabilis</i> (Penard, 1902)                 | 8  | - | + | + | - |
| Class Silicolosea (Adl et al., 2005, emend. Adl et al., 2012)  |    |   |   |   |   |
| Order Euglyphida (Copeland, 1956, emend. Cavalier-Smith, 1997) |    |   |   |   |   |
| Family Assulinidae (Lara et al., 2007)                         |    |   |   |   |   |
| * <i>Assulina muscorum</i> (Greef, 1888)                       | 6  | + | + | + | - |
| * <i>Valkanovia delicatula</i> (Valkanov, 1962)                | 4  | - | + | + | - |
| Family Cyphoderiidae (de Saedeleer, 1934)                      |    |   |   |   |   |
| * <i>Campascus minutus</i> (Penard, 1899)                      | 1  | + | - | - | - |
| Family Euglyphidae (Wallich, 1864, emend. Lara et al., 2007)   |    |   |   |   |   |
| * <i>Euglypha bryophila</i> (Brown, 1911)                      | 5  | - | + | + | + |
| * <i>Euglypha cristata</i> (Leidy, 1879)                       | 2  | + | + | - | - |
| * <i>Euglypha ciliata</i> (Ehrenberg, 1848)                    | 1  | - | + | - | - |
| * <i>Euglypha ciliata glabra</i> (Wailes, 1915)                | 4  | - | + | + | - |
| * <i>Euglypha filifera</i> (Penard, 1890)                      | 2  | - | + | + | - |
| * <i>Euglypha laevis</i> (Ehrenberg, 1832)                     | 15 | + | + | + | - |
| * <i>Euglypha rotunda</i> (Wailes, 1915)                       | 8  | + | + | + | - |
| * <i>Euglypha strigosa</i> (Ehrenberg, 1871)                   | 8  | - | + | + | - |
| * <i>Euglypha strigosa glabra</i> (Wailes, 1898)               | 3  | - | + | - | - |
| * <i>Euglypha tuberculata</i> (Dujardin, 1841)                 | 10 | + | + | + | + |
| Family Sphenoderiidae (Chatelain et al., 2013)                 |    |   |   |   |   |
| * <i>Sphenoderia fissirostris</i> (Penard, 1890)               | 1  | - | - | + | - |

| Family Trinematidae (Hoogenraad and De Groot, 1940, emend Adl et al., 2012) |    |    |    |    |    |
|-----------------------------------------------------------------------------|----|----|----|----|----|
| * <i>Corythion dubium</i> (Taránek, 1881)                                   | 5  | -  | +  | +  | -  |
| * <i>Corythion orbicularis</i> (Penard, 1910)                               | 1  | -  | -  | +  | -  |
| * <i>Playfairina valkanovi</i> (Golemansky, 1966)                           | 4  | -  | +  | +  | -  |
| * <i>Trinema complanatum</i> (Penard, 1890)                                 | 2  | -  | -  | +  | -  |
| * <i>Trinema enchelys</i> (Ehrenberg, 1838)                                 | 8  | +  | +  | +  | -  |
| * <i>Trinema galeata</i> (Penard, 1890)                                     | 1  | +  | -  | -  | -  |
| * <i>Trinema lineare</i> (Penard, 1890)                                     | 14 | +  | +  | +  | +  |
| Total species richness:                                                     |    | 32 | 47 | 55 | 14 |

**Table S5.** Hierarchical partitioning showing the individual importance of the environmental variables for different ecological groups and the significance permutation test (n = 999) based on the results of CCA. (\*  $0.01 < p < 0.05$ ; \*\*  $0.005 \leq p < 0.01$ ; \*\*\*  $0.001 \leq p < 0.005$ )

| Assemblage Variable                   | Explained variance, %            | P-value  |
|---------------------------------------|----------------------------------|----------|
| <b>Zooplankton</b>                    |                                  |          |
| Temperature, °C                       | 4.51                             | 0.088    |
| Mineralization, ppm                   | 3.44                             | 0.310    |
| Acidity, pH                           | 4.77                             | 0.043*   |
| log(Area, m <sup>2</sup> )            | 3.98                             | 0.105    |
| Permafrost, m                         | 2.8                              | 0.651    |
| Total                                 | 19.4 (F <sub>5,27</sub> ) = 1.31 | 0.03*    |
| <b>Macrobenthos</b>                   |                                  |          |
| Temperature, °C                       | 4.80                             | 0.099    |
| Mineralization, ppm                   | 4.67                             | 0.123    |
| Acidity, pH                           | 6.72                             | 0.006**  |
| log(Area, m <sup>2</sup> )            | 7.30                             | 0.002*** |
| Permafrost, m                         | 5.76                             | 0.028*   |
| Total                                 | 29.3 (F <sub>5,23</sub> ) = 1.90 | 0.001*** |
| <b>Meiobenthos</b>                    |                                  |          |
| Temperature, °C                       | 4.89                             | 0.059    |
| Mineralization, ppm                   | 4.36                             | 0.144    |
| Acidity, pH                           | 4.98                             | 0.029*   |
| log(Area, m <sup>2</sup> )            | 4.38                             | 0.059    |
| Permafrost, m                         | 3.68                             | 0.239    |
| Total                                 | 22.3 (F <sub>5,26</sub> ) = 1.49 | 0.002*** |
| <b>Microbenthos (testate amoebae)</b> |                                  |          |
| Temperature, °C                       | 10.3                             | 0.008**  |
| Mineralization, ppm                   | 2.62                             | 0.917    |
| Acidity, pH                           | 8.34                             | 0.022*   |
| log(Area, m <sup>2</sup> )            | 6.10                             | 0.131    |
| Permafrost, m                         | 4.04                             | 0.488    |
| Total                                 | 29.9 (F <sub>5,18</sub> ) = 1.53 | 0.005**  |

**Table S6.** Abbreviations list of aquatic species from the Lena River Delta

| Zooplankton |              | Meiobenthos |              |
|-------------|--------------|-------------|--------------|
| Species     | Abbreviature | Species     | Abbreviature |



|                                |          |                                |         |
|--------------------------------|----------|--------------------------------|---------|
| <i>Acroperus harpae</i>        | Acr.har  | <i>Attheyella trispinosa</i>   | Att.tri |
| <i>Alona affinis</i>           | Alo.aff  | <i>Bryocamptus arcticus</i>    | Bry.arc |
| <i>Alona guttata</i>           | Alo.gut  | <i>Bryocamptus vej dovskyi</i> | Bry.vej |
| <i>Alona quadrangularis</i>    | Alo.qua  | <i>Bryocamptus</i> sp. 1       | Bry.sp1 |
| Aloninae juv.                  | Alo.juv  | <i>Bryocamptus</i> sp. 2       | Bry.sp2 |
| <i>Alonopsis elongatus</i>     | Alo.elo  | <i>Canthocamptus glacialis</i> | Can.gla |
| <i>Bosmina cf. longispina</i>  | Bos.lon  | <i>Epactophanes richardi</i>   | Epa.ric |
| <i>Bosmina longirostris</i>    | Bos.long | <i>Moraria duthiei</i>         | Mor.dut |
| <i>Daphnia cucullata</i>       | Dap.cuc  | <i>Moraria</i> sp.             | Mor.sp. |
| <i>Daphnia longispina</i>      | Dap.lon  | <i>Moraria insularis</i>       | Mor.ins |
| <i>Daphnia pulex</i>           | Dap.pul  | <i>Moraria mrazeki</i>         | Mor.mra |
| <i>Eurycercus</i> juv          | Eur.juv  | <i>Maraenobiotus brucei</i>    | Mar.bru |
| <i>Eurycercus lamellatus</i>   | Eur.lam  | <i>Pesceus schmeili</i>        | Pes.sch |
| <i>Holopedium gibberum</i>     | Hol.gib  | <i>Pesceus cf. reductus</i>    | Pes.red |
| <i>Paralona pigra</i>          | Par.pig  | <i>Nannopus procerus</i>       | Nan.pro |
| <i>Sida crystallina</i>        | Sid.cry  | <i>Cyclops strenuus</i>        | Cyc.str |
| <i>Acanthocyclops venustus</i> | Aca.ven  | <i>Acanthocyclops venustus</i> | Aca.ven |
| <i>Acanthocyclops vernalis</i> | Aca.ver  | <i>Acanthocyclops vernalis</i> | Aca.ver |
| <i>Cyclops scutifer</i>        | Cyc.scu  | <i>Diacyclops crassicaudis</i> | Dia.cra |
| <i>Diacyclops bicuspidatus</i> | Dia.bic  | <i>Megacyclops viridis</i>     | Meg.vir |
| <i>Megacyclops viridis</i>     | Meg.vir  | <i>Eucyclops serrulatus</i>    | Euc.ser |
| <i>Mesocyclops leuckarti</i>   | Mes.leu  | <i>Paracyclops fimbriatus</i>  | Par.fim |
| <i>Eucyclops serrulatus</i>    | Euc.ser  | <i>Heterocope borealis</i>     | Het.bor |
| <i>Heterocope borealis</i>     | Het.bor  | <i>Acroperus harpae</i>        | Acr.har |
| <i>Eudiaptomus graciloides</i> | Eud.gra  | <i>Alona affinis</i>           | Alo.aff |
| <i>Eurytemora gracilicauda</i> | Eur.grac | <i>Alona quadrangularis</i>    | Alo.qua |
| <i>Eurytemora gracilis</i>     | Eur.gra  | Aloninae juv                   | Alo.juv |
| <i>Eurytemora raboti</i>       | Eur.rab  | <i>Alonopsis elongatus</i>     | Alo.elo |
| <i>Mixodiaptomus theeli</i>    | Mix.the  | <i>Bosmina longirostris</i>    | Bos.lon |
| Copepoda nauplii               | Cop.nau  | <i>Chydorus sphaericus</i>     | Chy.sph |
| <i>Canthocamptus glacialis</i> | Can.gla  | <i>Daphnia pulex</i>           | Dap.pul |
| <i>Polyartemia forcipata</i>   | Pol.for  | <i>Eurycercus</i> juv.         | Eur.juv |
| Ostracoda                      | Ost      | Ostracoda                      | Ost     |

| Macrozoobenthos                     |              | Microbenthos                    |              |
|-------------------------------------|--------------|---------------------------------|--------------|
| Species                             | Abbreviation | Species                         | Abbreviation |
| <i>Arcella arenaria</i>             | Arc.are      | <i>Piscicola geometra</i>       | Pis.geo      |
| <i>Arcella arenaria compressa</i>   | Arc.arec     | <i>Gyraulus borealis</i>        | Gyr.bor      |
| <i>Arcella discoides</i>            | Arc.dis      | <i>Physa</i> sp.                | Phy.sp.      |
| <i>Arcella discoides foveosa</i>    | Arc.disf     | <i>Sibirenauta sibirica</i>     | Sib.sib      |
| <i>Arcella gibbosa</i>              | Arc.gib      | <i>Euglesa casertana</i>        | Eug.cas      |
| <i>Arcella hemisphaerica</i>        | Arc.hem      | <i>Henslowiana lilljeborgii</i> | Hen.lil      |
| <i>Arcella rotundata</i>            | Arc.rot      | <i>Roseana borealis</i>         | Ros.bor      |
| <i>Arcella rotundata stenostoma</i> | Arc.rots     | <i>Hydrachnidia</i> spp.        | Hyd.spp      |
| <i>Argynnia dentistoma</i>          | Arg.den      | <i>Asellus hilgendorffii</i>    | Ase.hil      |
| <i>Argynnia dentistoma laevis</i>   | Arg.denl     | <i>Gammarus lacustris</i>       | Gam.lac      |

|                                          |          |                                                |          |
|------------------------------------------|----------|------------------------------------------------|----------|
| <i>Campascus minutus</i>                 | Cam.min  | <i>Synurella jakutana</i>                      | Syn.jak  |
| <i>Centropyxis aculeata</i>              | Cen.acu  | <i>Baetis macani</i>                           | Bae.mac  |
| <i>Centropyxis aculeata oblonga</i>      | Cen.acuo | <i>Nemoura arctica</i>                         | Nem.arc  |
| <i>Centropyxis aerophila</i>             | Cen.aer  | <i>Grensia praeterita</i>                      | Gre.pra  |
| <i>Centropyxis aerophila sphagnicola</i> | Cen.aers | <i>Hydatophylax</i> sp.                        | Hyd.sp.  |
| <i>Centropyxis cassis</i>                | Cen.cas  | <i>Micrasema</i> gr. <i>gelidum</i>            | Mic.gel  |
| <i>Centropyxis constricta</i>            | Cen.con  | <i>Agabus adpressus</i>                        | Aga.adp  |
| <i>Centropyxis elongata</i>              | Cen.elo  | <i>Agabus elongatus</i>                        | Aga.elo  |
| <i>Centropyxis gasparella</i>            | Cen.gas  | <i>Gyrinus opacus</i>                          | Gyr.opa  |
| <i>Centropyxis marsupiformis</i>         | Cen.mar  | <i>Hydroporus lapponum</i>                     | Hyrd.lap |
| <i>Centropyxis minuta</i>                | Cen.min  | <i>Hydrophorus</i> sp.                         | Hydr.sp  |
| <i>Centropyxis platystoma</i>            | Cen.pla  | <i>Boreosimulium baffinensis</i>               | Bor.baf  |
| <i>Cyclopyxis eurystoma</i>              | Cyc.eur  | <i>Culiseta bergrothi</i>                      | Cul.ber  |
| <i>Diffugia bacilliarum</i>              | Dif.bac  | <i>Euphyllidorea lineola</i>                   | Eup.lin  |
| <i>Diffugia brevicolla</i>               | Dif.bre  | <i>Phyllidorea nervosa</i>                     | Phy.ner  |
| <i>Diffugia cylindrus</i>                | Dif.cyl  | <i>Acricotopus lucens</i>                      | Acr.luc  |
| <i>Diffugia gassowskii</i>               | Dif.gas  | <i>Chironomus</i> sp.                          | Chi.sp.  |
| <i>Diffugia gigantea</i>                 | Dif.gig  | <i>Cladotanytarsus</i> gr. <i>mancus</i>       | Cla.man  |
| <i>Diffugia globulosa</i>                | Dif.glo  | <i>Corynoneura scutellata</i>                  | Cor.scu  |
| <i>Diffugia gramen</i>                   | Dif.gra  | <i>Cricotopus fuscus</i>                       | Cri.fus  |
| <i>Diffugia lucida</i>                   | Dif.luc  | <i>Cryptochironomus</i> gr. <i>defectus</i>    | Cry.def  |
| <i>Diffugia microstoma</i>               | Dif.mic  | <i>Derotanypus sibiricus</i>                   | Der.sib  |
| <i>Diffugia oblonga</i>                  | Dif.obl  | <i>Dicrotendipes nervosus</i>                  | Dic.ner  |
| <i>Diffugia parva</i>                    | Dif.par  | <i>Dicrotendipes septemmaculatus</i>           | Dic.sep  |
| <i>Diffugia penardi</i>                  | Dif.pen  | <i>Glyptotendipes gripekoveni</i>              | Gly.gri  |
| <i>Euglypha cristata</i>                 | Eug.cri  | <i>Heterotrissocladius</i> gr. <i>maeaeri</i>  | Het.mae  |
| <i>Euglypha filifera</i>                 | Eug.fil  | <i>Heterotrissocladius</i> gr. <i>marcidus</i> | H..mar   |
| <i>Euglypha laevis</i>                   | Eug.lae  | <i>Limnophyes</i> sp.                          | Lim.sp.  |
| <i>Euglypha strigosa</i>                 | Eug.str  | <i>Lipiniella araenicola</i>                   | Lip.ara  |
| <i>Euglypha strigosa glabra</i>          | Eug.strg | <i>Oliveridia</i> sp.                          | Oli.sp.  |
| <i>Euglypha tuberculata</i>              | Eug.tub  | <i>Orthocladius</i> sp. 2                      | Ort.sp2  |
| <i>Heleopera petricola</i>               | Hel.pet  | <i>Orthocladius</i> sp. 3                      | Ort.sp3  |
| <i>Heleopera petricola amethystea</i>    | Hel.peta | <i>Orthocladius</i> sp. 4                      | Ort.sp4  |
| <i>Heleopera sphagni</i>                 | Hel.sph  | Diamesinae sp. 1                               | Dia.sp1  |
| <i>Hyalosphenia platystoma</i>           | Hya.pla  | Diamesinae sp. 2                               | Dia.sp2  |
| <i>Lagenodiffugia sphaeroideus</i>       | Lag.sph  | <i>Procladius</i> sp.                          | Pro.sp.  |
| <i>Lesquereusia epistonium</i>           | Les.epi  | <i>Psectrocladius</i> sp.                      | Pse.sp.  |
| <i>Longinebela penardiana</i>            | Lon.pen  | <i>Psectrocladius obvius</i>                   | Pse.obv  |
| <i>Microchlamys patella</i>              | Mic.pat  | <i>Psectrocladius delatoris</i>                | Pse.del  |
| <i>Microchlamys</i> sp                   | Mic.sp   | <i>Psectrocladius fabricus</i>                 | Pse.fab  |
| <i>Nebela tincta</i>                     | Neb.tin  | <i>Psectrocladius fennicus</i>                 | Pse.fen  |

|                                  |         |                                   |         |
|----------------------------------|---------|-----------------------------------|---------|
| <i>Padaungiella lageniformis</i> | Pad.lag | <i>Psectrocladius ventricosus</i> | Pse.ven |
| <i>Padaungiella wailesi</i>      | Pad.wai | <i>Stictochironomus</i> sp.       | Sti.sp. |
| <i>Paraquadrula irregularis</i>  | Par.irr | <i>Tanytarsus</i> sp.             | Tan.sp. |
| <i>Phryganella acropodia</i>     | Phr.acr | <i>Alexandrovina ringulata</i>    | Ale.rin |
| <i>Playfarina valkanovi</i>      | Pla.val | <i>Eiseniella tetraedra</i>       | Eis.tet |
| <i>Pyxidicula gibbosa</i>        | Pyx.gib | Enchytraeidae sp.                 | Enc.sp. |
| <i>Pyxidicula operculata</i>     | Pyx.ope | <i>Embolocephalus velutinus</i>   | Emb.vel |
| <i>Pyxidicula</i> sp.            | Pyx.sp. | <i>Limnodrilus</i> sp.            | Lymn.sp |
| <i>Sphenoderia fissirostris</i>  | Sph.fis | <i>Spirosperma ferox</i>          | Spi.fer |
| <i>Trygonopyxis arcula</i>       | Try.arc |                                   |         |
| <i>Trinema complanatum</i>       | Tri.com |                                   |         |
| <i>Trinema enchelys</i>          | Tri.enc |                                   |         |
| <i>Valkanovia delicatula</i>     | Val.del |                                   |         |
| <i>Zivkovicia compressa</i>      | Ziv.com |                                   |         |
